# Supplementary material for: Structure-guided inhibition of the cancer DNA-mutating enzyme APOBEC3A
Source: PubMed Central journal article supplement (PMC9949147; doi:10.1101/2023.02.17.528918), 2023-02-17
Supplement: media-1.pdf [file media-1.pdf]

1 **Supplementary Information**

2

3 **Structure-guided inhibition of the cancer DNA-mutating enzyme APOBEC3A**

4

5 Stefan Harjes<sup>1</sup>, Harikrishnan M. Kurup<sup>1</sup>, Amanda E. Rieffer<sup>2</sup>, Maitsetseg Bayarjargal<sup>1,3</sup>, Jana  
6 Filitcheva<sup>1</sup>, Yongdong Su<sup>1,4</sup>, Tracy K. Hale<sup>1</sup>, Vyacheslav V. Filichev\*<sup>1,5</sup>, Elena Harjes\*<sup>1,5</sup>,  
7 Reuben S. Harris\*<sup>6,7</sup> and Geoffrey B. Jameson\*<sup>1,5</sup>

8

9 <sup>1</sup> School of Natural Sciences, Massey University, Palmerston North, New Zealand

10 <sup>2</sup> Department of Biochemistry, Molecular Biology, and Biophysics, University of Minnesota-  
11 Twin Cities, Minneapolis, MN, USA

12 <sup>3</sup> Current address: Department of Biochemistry, University of Washington, Seattle, WA,  
13 USA

14 <sup>4</sup> Current address: Department of Pediatrics, Emory University School of Medicine, and the  
15 Aflac Cancer and Blood Disorders Center, Children's Healthcare of Atlanta, Atlanta, GA,  
16 USA

17 <sup>5</sup> Maurice Wilkins Centre for Molecular Biodiscovery, University of Auckland, Auckland,  
18 New Zealand

19 <sup>6</sup> Department of Biochemistry and Structural Biology, University of Texas Health San  
20 Antonio, San Antonio, TX, USA

21 <sup>7</sup> Howard Hughes Medical Institute, University of Texas Health San Antonio, San Antonio,  
22 TX, USA

23 \*Correspondence: [G.B.Jameson@massey.ac.nz](mailto:G.B.Jameson@massey.ac.nz), [e.harjes@massey.ac.nz](mailto:e.harjes@massey.ac.nz),  
24 [v.filichev@massey.ac.nz](mailto:v.filichev@massey.ac.nz), [rsh@uthscsa.edu](mailto:rsh@uthscsa.edu)

25

26

27 Contents:

28 Supplementary Analysis and Discussion of Results

29 Figure S1

30 Tables S1-S2

31

32

33

34

35

36

37

38

## 39 SUPPLEMENTARY ANALYSIS AND DISCUSSION OF RESULTS

40 Our structural studies establish that the stem-loop preconfigures the TC recognition motif in  
41 optimal position for binding to A3A, such that hairpin DNAs are more active substrates and  
42 as the 2'-deoxy-5-fluorozebularine derivative more potent inhibitor of A3A than linear  
43 ssDNA. Both 3- and 4-membered nucleotide loops present the TC motif in identical  
44 configuration. Although hinted at in earlier structures with ssDNA, a crucial role for His29  
45 (and to a lesser extent Arg28) in substrate binding is confirmed, also explaining A3A  
46 preferential deamination of YTCR motif<sup>16</sup>. This has implications for activity of A3A leading  
47 to genomic instability and for the design of inhibitors to mitigate mutagenic activity of A3A  
48 in a wide variety of cancers. Interestingly, A3B does not have a strong preference in -2  
49 position<sup>17</sup> and has an Arg instead of His29 in the corresponding position<sup>16</sup>.

50 As the phosphorothioated derivatives, our inhibitors are highly resistant to nuclease  
51 degradation and can be directed to the nucleus with the aid of a commonly used transfection  
52 reagent. Moreover, we have obtained the first proof of inhibition of mutagenic activity of  
53 A3A in cells.

54

### 55 Isothermal Titration Calorimetric Results

56 Isothermal titration calorimetry (ITC) measurements were conducted for the binding of  
57 TTFdZ-hairpin (Extended Data **Fig. 4a**) and PS-TTFdZ-hairpin (Extended Data **Fig. 4b**) to  
58 A3A-E72A. Binding was substantially exothermic but offset by an unfavorable entropy of  
59 binding (Supplementary Information **Table 1**). At first sight this is counter-intuitive, as the  
60 hairpin is conformationally much less flexible than linear DNA; however, the negative entropy  
61 of binding reflects changes in dynamics of the protein and especially of the extended Loop-3  
62 that in substrate-free structures is highly mobile. The dissociation constants  $K_d$  cannot be  
63 compared with  $K_m$  results, as the latter is on active enzyme that offers greater hydrogen-  
64 bonding potential than the former, as the former is on inactive enzyme A3A-E72A;  
65 additionally, to ameliorate problems of aggregation of protein due to the much higher  
66 concentrations required for ITC compared to enzymatic assays bovine serum albumin was  
67 present (30 mg/mL), as well as choline acetate (50 mM).

68

### 69 X-Ray Crystallographic Results

70 We obtained six structures, i.e. A3A-E72A with TTC-hairpin with and without zinc, ATTC-  
71 hairpin, CTTC-hairpin, and two structures of wild-type A3A with TTFdZ-hairpin.  
72 Notwithstanding full, partial or zero occupancy of the  $Zn^{2+}$  site, all structures share a common  
73 binding of residues  $-2$ ,  $-1$ ,  $0$  and  $+1$  to A3A-E72A, as highlighted in **Fig. 1e** and **f**. The  
74 nucleophilic water/hydroxide expected to be bound to the  $Zn^{2+}$  center is replaced by  $Cl^-$  in these  
75 structures and others of A3A-E72A, which all feature NaCl in the crystallization medium<sup>19</sup>.

76 All structures are approximately isomorphous in space group  $P2_1$ . The packing of molecules  
77 in the unit cell is shown in cartoon form in Extended Data **Fig. 2**, highlighting differences in  
78 interactions between bases of hairpins for different hairpins. All structures of A3A-E72A show  
79 a chloride in the active-site cavity, coordinating to the  $Zn^{2+}$ , when the latter is present. In  
80 addition to this chloride, there is a water molecule that hydrogen bonds to the chloride ion, to  
81 N3 of the cytosine at position  $0$ , and to the main chain N of residue  $72$ . This  $Cl^-$  and  $H_2O$   
82 occupy, approximately, likely positions of the carboxylate oxygens of Glu72 of wild-type A3A  
83 (and also the structure of the catalytic C-terminal domain of A3G<sup>20</sup>). For structures of A3A,  
84 A3B and A3G where the general acid-base glutamate/glutamic acid has been mutated to  
85 alanine, this pair of atoms ( $Cl^-$  and  $H_2O$ ) is ubiquitous in electron density maps of all A3A,  
86 A3B and A3G enzymes, if not always included in the structural model structures of these  
87 enzymes<sup>21</sup>. For the structure of A3G with the Glu $\rightarrow$ Ala mutation and substrate bound, a water  
88 molecule is reported at the site<sup>22</sup>.

89 Consistent across all structures of A3 with single-stranded DNA oligonucleotide there is a tight  
90 turn to project substrate (or inhibitor) at position  $0$  into the active site. This is accomplished  
91 with non-standard torsion angles for the phosphate groups, such that phosphate...phosphate  
92 distances (as P...P) range from  $6.2$ - $7.3$  Å for all nucleotides except for the phosphate group  
93 that links nucleotides at positions  $0$  and  $+1$ , where it shortens by more than an Ångstrom to  
94  $5.1$ - $5.6$  Å. The torsion angle for residues in the stem of the hairpin,  ${}^n C3' - {}^n O3' - ({}^{n+1}) P - ({}^{n+1}) O5'$   
95 and  ${}^n O4' - {}^n C4' - {}^n C5' - {}^n O5'$ , generally lie in the expected range for B-conformation DNA,  
96 respectively,  $\sim -90^\circ$  and  $-70^\circ$ . Ultra-high resolution crystal structures (PDB ID 3u89 and  
97 2be3)<sup>23-24</sup> of self-complementary 12-mer, ostensibly B-DNA, reveal considerable  
98 conformational flexibility and crystallographic disorder in the dodecamer with torsion angles  
99 well outside the canonical values for B-DNA. For residues in the loop ( $n = -2, -1, 0$ ), the  
100 torsion angles  ${}^n C3' - {}^n O3' - ({}^{n+1}) P - ({}^{n+1}) O5'$  are respectively approximately,  $-160^\circ$ ,  $+110^\circ$  and  $60^\circ$ ,  
101 values substantially different to B-DNA.

102 For the phosphate linking positions -1 and 0, this amounts to an eclipsed conformation for the  
103 torsion angle  $C3\phi-O3\phi-P\phi-O1\phi$ . For residues 0 and +1 in three-membered loops, the torsion  
104 angles  ${}^nO4'-{}^nC4'-{}^nC5'-{}^nO5'$  of  $\sim 176^\circ$  also differ substantially from those generally expected for  
105 B-DNA and found in the stem of  $\sim 70^\circ$ . Essentially the conformation changes from staggered  
106 to *trans*. For the four-membered loops the residue at -3 is flipped out and in order for the C-  
107 G pair at -4 and +1 to hydrogen bond, the torsion angle  ${}^nO4'-{}^nC4'-{}^nC5'-{}^nO5'$  at residue +1 is  
108  $\sim +90^\circ$ . The torsion angle  ${}^nP-{}^nO5'-{}^nC5\phi-{}^nC4\phi$  decreases from  $\sim +170^\circ$  in the stem and positions  
109 -2 and -1 to  $\sim +120^\circ$  at position 0.

110 All 2'-deoxyribose units adopt the expected C2'-endo conformation, with C5'-C4'-C3'-O3'  
111 torsions angles in the range  $120-150^\circ$  (lower values generally associated with pyrimidine  
112 nucleobases and higher values with purine nucleobases, as previously observed<sup>23-24</sup>) except  
113 those at positions -4 and -3 in structures with four-membered loops, where to accommodate  
114 the flipped-out residue at -3, this torsion angle is  $\sim 85^\circ$ , a value characteristic of A-DNA.<sup>25</sup>

115 Our assignment of nitrogen atoms to the positions in the ring of His29 is based on the following  
116 interactions. His29-N $\delta_1$  (amine tautomer) forms a semi-salt bridge with the phosphate oxygen  
117 at the 3' position of C<sup>0</sup>, and also forms a sub-optimal hydrogen bond to deoxyribose O4' of  
118 G<sup>+1</sup>. An alternative assignment of orientation of His29 to form a canonical hydrogen bond  
119 between His29-N $\delta_1$  and O2 of T<sup>-2</sup> would require movement of His29 into a sterically less  
120 favourable conformation, as well as destroying the bifurcated hydrogen bond that locks in the  
121 sharp-turn. Moreover, the semi-salt bridge described above is much stronger than a canonical  
122 hydrogen bond between neutral parties in alternative assignment. In the highest resolution  
123 structure featuring the ATTC-hairpin, a well-defined water is observed off the assigned N $\epsilon_2$   
124 atom at 2.80 Å, which further confirms the assignment of atoms in His29.

125 *Inter alia*, O3 $\phi$  at position -1 forms a hydrogen bond to N $\delta_1$  of His29. His29-N $\delta_1$  makes contact  
126 (3.4 Å) with ribose O4' of guanine +1 and to phosphate O of cytosine 0, which in turns supports  
127 base pairing of G<sup>+1</sup> with C<sup>-3</sup>. His29-C $\delta_2$  makes a non-classical hydrogen bond with carbonyl  
128 oxygen O2 of thymine-2; and His29-N $\epsilon_2$  hydrogen bonds to a well-defined water. Finally,  
129 His29 pi stacks with G<sup>+1</sup>, possibly as cation- $\pi$  if His29 is protonated. Arg28 forms a cation- $\pi$   
130 interaction with T<sup>-2</sup>.

131 Altogether, the A3A-hairpin interaction is provided by about 40 protein atoms and about 40  
132 nucleotide atoms, highlighted as spheres with associated residues as sticks. Those are in van

133 der Waals or hydrogen bonding contact at a tight threshold of 3.5 Å. A space-filling  
134 representation (Extended Data **Fig. 3a**) further highlights the key role of His29, Arg28 and  
135 Loop-3 in controlling the conformation of the loop and determining preference of A3A for  
136 purines in +1 and pyrimidines in -2 positions and for hairpin oligonucleotides over linear  
137 ssDNA.

138

#### 139 Structure of A3A-E72A- $\frac{1}{2}$ Zn<sup>2+</sup> complexed with TTC-hairpin

140 This structure was determined to a resolution of 2.22 Å. The Zn<sup>2+</sup> ion is present in only about  
141 half occupancy. The chloride ion is present in full occupancy and is bound to the Zn<sup>2+</sup>, if Zn<sup>2+</sup>  
142 is present. The T<sup>-1</sup>C<sup>0</sup>N<sup>+1</sup> (where N is G, T or A) moiety adopts a conformation very similar to  
143 that seen for linear oligo binding in one structure to A3A (PDB: 5keg<sup>10</sup>), but for binding in  
144 another A3A structure (5sww<sup>21</sup>) only the TC moiety closely aligns. All residues of the hairpin  
145 are observed, and the thymines at each foot of the stem hydrogen bond to each other (Extended  
146 Data **Fig. 2a,b**). In the previous structure of A3A-E72A (5keg) the cysteine 171 was mutated  
147 to alanine, most likely to prevent possible dimerization but in our structure Cys171 is present  
148 in reduced form. The interaction of TTC-hairpin with A3A-E72A is shown in Extended Data  
149 **Fig. 3c**.

150

#### 151 Structure of A3A-E72A-no Zn<sup>2+</sup> complexed with TTC-hairpin

152 This structure was determined to a resolution of 2.10 Å. The Zn<sup>2+</sup> ion is entirely absent. Its  
153 absence is not an artefact of synchrotron radiation-induced damage, as an in-house data set  
154 from a crystal from the same drop also showed an absence of Zn<sup>2+</sup>. The chloride ion is present  
155 in full occupancy and located in the same position as in the Zn<sup>2+</sup>-containing structures. The  
156 hairpin oligonucleotide superimposes closely on that for the (partially) Zn<sup>2+</sup>-containing  
157 structure, A3A-E72A/TTC-hairpin. However, as illustrated in Extended Data **Fig. 1c,d**, there  
158 are substantial changes in positions of the otherwise Zn<sup>2+</sup>-coordinating residues, as they seek  
159 to minimise repulsion. In particular, the loop bearing Zn<sup>2+</sup>-binding Cys101 and Cyts106 flips  
160 to move these Cys away from each other and the other otherwise Zn<sup>2+</sup>-binding ligand His70.

161

#### 162 Structure of A3A-E72A-Zn<sup>2+</sup> complexed with ATTTC-hairpin

163 The structure of A3A with a potentially 6-base-pair stem and a 4-membered loop was  
164 determined to 1.91-Å resolution. The T<sup>-2</sup>TC motif binds the same as for the three-membered  
165 loop (**Fig. 1e,f**). However, the residue at -3 is flipped out, such that the cytosine at the -4  
166 position hydrogen-bonds with little distortion to the guanine at +1 and the stem duplex is in  
167 register with substrates bearing just three residues in the loop (**Fig. 1e,f**). The chloride ion and  
168 water molecule noted earlier are also present in this structure. By virtue of being the structure  
169 with highest resolution, more water molecules are observed here than in other structures. The  
170 interaction of ATTC-hairpin with A3A-E72A is shown in Extended Data **Fig. 3** The packing  
171 of molecules is shown in Extended Data **Fig. 2d,e**. The low-resolution (3.15 Å) structure of  
172 A3A-E72A with CTTC-hairpin largely confirms this structure (**Fig. 1d,e**).

173 Whereas in structures with TTC-hairpin, which forms four canonical Watson-Crick base pairs  
174 and a thymine base pair, ATTC-hairpin has the potential to form an additional base-pair for a  
175 total of six Watson-Crick base pairs. However, five base pairs appear to define a “goldilocks”  
176 crystal packing. Thus, for ATTC-hairpin, in the crystalline state, there are only five base pairs  
177 and the last guanine (<sup>+6</sup>G) interacts loosely with the <sup>-8</sup>C<sup>+5</sup>G pair of the second molecule in the  
178 asymmetric unit (Extended Data **Fig. 2d,e**). The cytosine at position -9 is not observed and is  
179 presumably flipped out and conformationally flexible.

180

#### 181 Structure of A3A-E72A-Zn<sup>2+</sup> complexed with CTTC-hairpin

182 Although this structure was determined to only 3.15 Å, the conformation of the oligonucleotide  
183 is well defined for residues -4 to +4. The shorter stem is less well defined, in part because four  
184 base pairs, one of which is an AT pair, do not confer high stability and in part because crystal  
185 packing is less effective where residues at the 5' and 3' ends of CTTC-hairpin base-stack  
186 weakly to the basal residues of the stem of the other A3A/CTTC-hairpin complex in the  
187 asymmetric unit, in contrast to the TTC- and ATTC-hairpins molecules (**Fig. 1d,e**). The 2'-  
188 deoxyribose-phosphate backbone of the loops is essentially identical to that for ATTC-hairpin,  
189 although the orientation of the flipped-out nucleobase at position -3 is possibly different. In  
190 both the ATTC- and CTTC-hairpin structures, this flipped-out nucleobase is very much more  
191 mobile than adjacent nucleobases, as evidenced by markedly higher atomic displacement  
192 parameters (*B*-values). In one subunit, the hairpin can be traced from -6 to +4 (end residue -7  
193 not visible) and is superimposable on that for corresponding residues for ATTC-hairpin.  
194 However, in the other subunit, electron density for the hairpin is traceable from positions +6 to

195 –4 (relative to the expected conformation and threading of the hairpin analogous to that  
196 observed in the other subunit for all other hairpins). This leads to the uncomfortable conclusion  
197 that in order to maintain crystal packing contacts, this hairpin is threaded differently so that  
198 residues GACC, rather than the expected CTTC, form the loop; that is, there is a three-residue  
199 shift. Relevant to this is that CCC, the preferred substrate of A3G, is a substrate of A3A,  
200 although a much poorer substrate than the preferred substrate TTC of A3A and A3B. Whereas  
201 in the expected threading a C<sup>-4</sup>G<sup>+1</sup> pair sits at the top of the stem, in the unexpected threading  
202 it is a C<sup>-7</sup>T<sup>-2</sup> pair (**Fig. 1d** numbering).

203 Amongst the various structures of A3A, there is always slight variations in the position of  
204 the B subunit (and its hairpin) relative to the A subunit, as seen in Extended Data **Fig. 1**.

205

206 Structure of wild-type A3A-Zn<sup>2+</sup> complexed with TTFdZ-hairpin

207 This complex has been determined in two slightly different crystal forms of low isomorphism  
208 to 2.80 and 2.94 Å resolution (Extended Data **Table S2**). The molecules of the two forms and  
209 molecules A and B of the asymmetric unit of a given form are, however, closely isostructural  
210 (Extended Data **Fig. 1a**).

211



Supplementary Table S1 | ITC data for titration of A3A-E72A with TTC- or PS-TTC-hairpin<sup>a</sup>

| Experiment     | n                              | K [ $10^3/M$ ]  | $\Delta H$ [kcal/mol] | $\Delta S$ [cal/mol/K] |
|----------------|--------------------------------|-----------------|-----------------------|------------------------|
| PO-TTC-hairpin | $1.08 \pm 4.6 \times 10^{-3}$  | $8.72 \pm 0.60$ | $-11.9 \pm 0.073$     | -12.6                  |
| PO-TTC-hairpin | $1.03 \pm 2.9 \times 10^{-3}$  | $11.3 \pm 0.56$ | $-12.6 \pm 0.053$     | -14.7                  |
| PO-TTC-hairpin | $1.08 \pm 3.8 \times 10^{-3}$  | $6.72 \pm 0.34$ | $-13.1 \pm 0.066$     | -17.3                  |
| mean           | $1.06 \pm 0.024$               | $8.91 \pm 1.9$  | $-12.5 \pm 0.49$      | $-14.9 \pm 1.9$        |
| PS-TTC-hairpin | $1.08 \pm 4.7 \times 10^{-3}$  | $6.62 \pm 0.41$ | $-15.0 \pm 0.092$     | -23.8                  |
| PS-TTC-hairpin | $1.04 \pm 4.1 \times 10^{-3}$  | $7.26 \pm 0.42$ | $-15.6 \pm 0.087$     | -25.5                  |
| PS-TTC-hairpin | $0.991 \pm 9.1 \times 10^{-3}$ | $3.87 \pm 0.32$ | $-17.5 \pm 0.22$      | -33.2                  |
| PS-TTC-hairpin | $1.03 \pm 6.8 \times 10^{-3}$  | $9.98 \pm 0.10$ | $-14.9 \pm 0.14$      | -22.4                  |
| mean           | $1.03 \pm 0.031$               | $6.93 \pm 2.2$  | $-15.8 \pm 1.0$       | $-26.2 \pm 4.2$        |

<sup>a</sup> Error given is the fitting error except for the mean, where the root mean square is noted.

Supplementary Table S2a | Kinetic constants determined for A3A-catalyzed deamination of linear and hairpin DNA, using NMR-based assay.<sup>a</sup>

| Name        | Sequence, 5'-to-3'                            | $k_{cat}$ (/s <sup>-1</sup> ) | $K_m$ (/μM)    | $k_{cat}/K_m$ (/s <sup>-1</sup> mM <sup>-1</sup> ) |
|-------------|-----------------------------------------------|-------------------------------|----------------|----------------------------------------------------|
| Linear DNA  | A <sub>2</sub> T <sub>2</sub> CA <sub>4</sub> | $0.30 \pm 0.06$               | $3000 \pm 900$ | $0.10 \pm 0.03$                                    |
| TTC-hairpin | T(GC) <sub>2</sub> TTC(GC) <sub>2</sub> T     | $0.13 \pm 0.03$               | $31 \pm 6$     | $4.2 \pm$                                          |

Supplementary Table S2b |  $K_i$  values of inhibitors of wild-type A3A against TTC-hairpin substrate.<sup>a</sup>

| Name             | Sequence, 5'-to-3' |
|------------------|--------------------|
| FdZ-linear       | $2400 \pm 940$     |
| TTFdZ-hairpin    | $117 \pm 15$       |
| PS-TTFdZ-hairpin | $160 \pm 70$       |

<sup>a</sup> See Methods for experimental details.

213 **Supplementary Fig. S1**

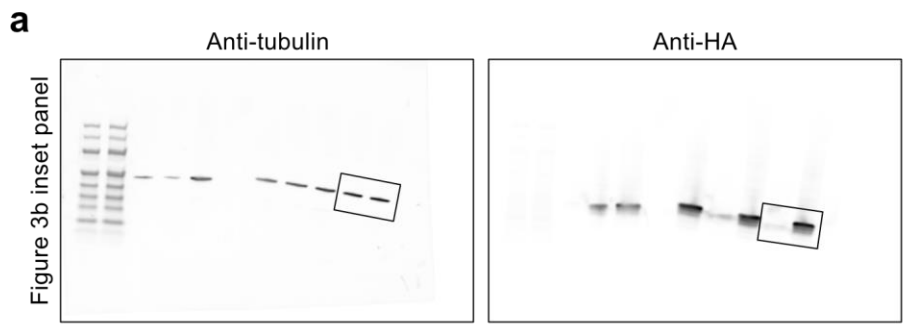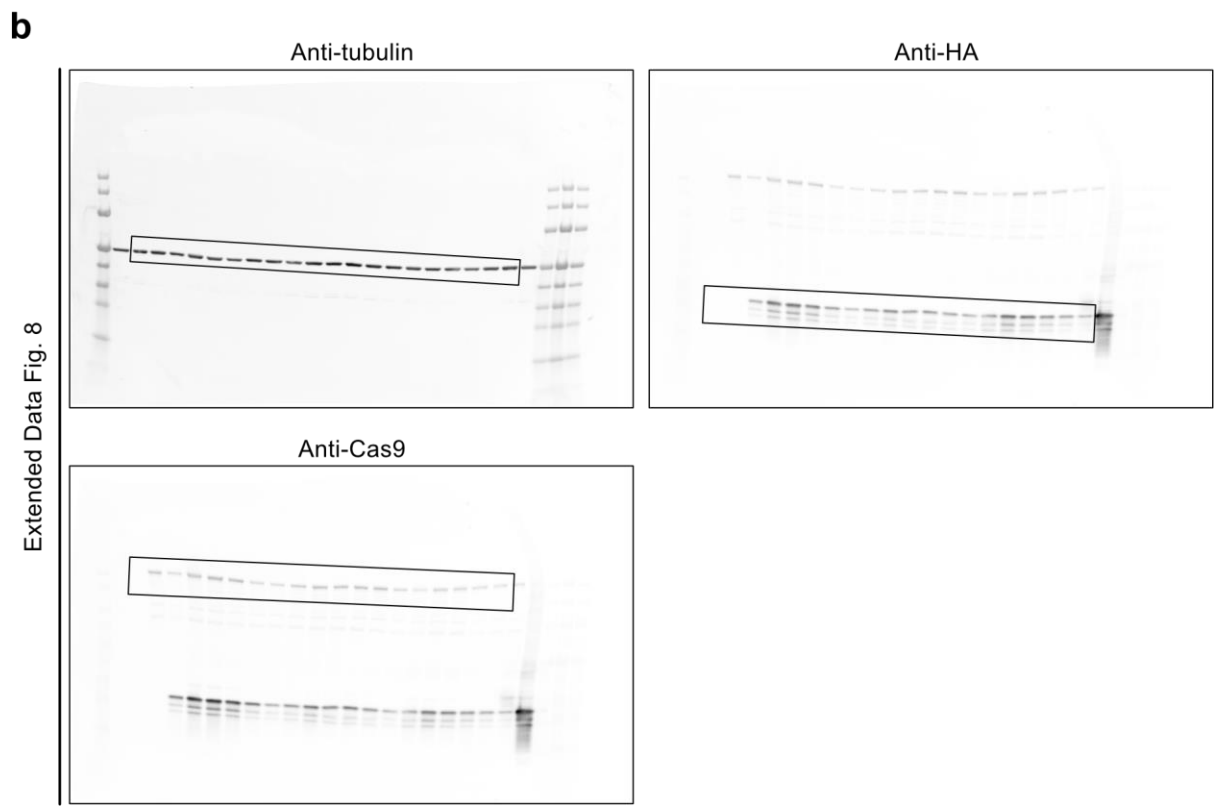

214

215 **Supplementary Fig. S1:** Original and uncropped immunoblots for (a) Fig. 3b inset panel and  
216 (b) Extended Data Fig. 8.

217
